# Supplementary material
Source: publisher site journal article supplement (http://www.kjim.org/upload/media/kjim-2019-066-suppl1.pdf)

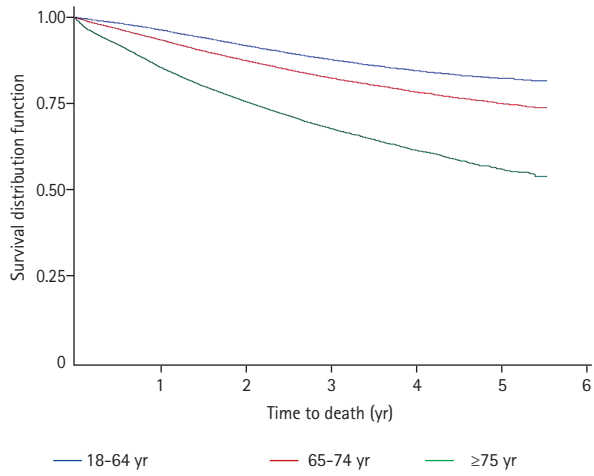

**Supplementary Figure 1.** Survival rate according to age groups.

Supplement: Supplementary file 1 [file kjim-2019-066-suppl1.pdf]
